# Supplementary material
Source: PubMed Central journal article supplement (PMC5833543)
Supplement: jama-319-49-s001.pdf [file jama-319-49-s001.pdf]

## Supplementary Online Content

Purnell TS, Luo X, Cooper LA, et al. Association of race and ethnicity with live donor kidney transplantation in the United States from 1995 to 2014. *JAMA*. doi:10.1001/jama.2017.19152

**eTable 1.** Sensitivity analysis: Cox regression model results

**eTable 2.** Sensitivity analysis: models stratified by age categories, neighborhood poverty, education, and health insurance type

**eTable 3.** Sensitivity analysis: contemporary reference cohort

**eTable 4.** Sensitivity analysis: inclusion of non-waitlisted LDKT recipients

**eTable 5.** Sensitivity analysis: restricted to active status waitlist candidates

**eTable 6.** Characteristics of LDKT recipients and donors by race/ethnicity, from 1995-1999 to 2010-2014

This supplementary material has been provided by the authors to give readers additional information about their work.

**eTable 1.** Sensitivity analysis: Cox regression model results

The tables below show the **A)** crude LDKT estimates by race/ethnicity and time cohort and the adjusted hazard ratios (HRs) from Cox models: **B)** comparing LDKT in recent candidate cohorts to the earliest time cohort (1995-1999) by race/ethnicity and **C)** comparing racial/ethnic disparities in LDKT by time cohort. Inferences obtained from Cox models are similar to inferences obtained from competing risk models.

**A. Crude LDKT Estimates**

| Listing Year | Crude Number of LDKTs (Total Denominator; % of Denominator) |                      |                       |                     |
|--------------|-------------------------------------------------------------|----------------------|-----------------------|---------------------|
|              | White                                                       | Black                | Hispanic              | Asian               |
| 1995-1999    | 5472<br>(42210; 13.0)                                       | 1351<br>(22855; 5.9) | 999<br>(8937; 11.2)   | 316<br>(3771; 8.4)  |
| 2000-2004    | 9096<br>(46633, 19.5)                                       | 2445<br>(28794; 8.5) | 1963<br>(14549; 13.5) | 605<br>(5727; 10.6) |
| 2005-2009    | 12293<br>(61768; 19.9)                                      | 2718<br>(39006; 7.0) | 2628<br>(21918; 12.0) | 834<br>(8563; 9.7)  |
| 2010-2014    | 12648<br>(66429; 19.0)                                      | 2412<br>(44678; 5.4) | 2767<br>(26508; 10.4) | 969<br>(10816; 9.0) |

**B. Temporal Changes in LDKT – Adjusted Hazard Ratios\***

| Listing Year | Cox Model - Adjusted Hazard Ratios (95% CI) |                  |                  |                  |
|--------------|---------------------------------------------|------------------|------------------|------------------|
|              | White                                       | Black            | Hispanic         | Asian            |
| 1995-1999    | Reference                                   | Reference        | Reference        | Reference        |
| 2000-2004    | 1.53 (1.48-1.58)                            | 1.48 (1.38-1.58) | 1.24 (1.15-1.34) | 1.35 (1.18-1.55) |
| 2005-2009    | 1.73 (1.67-1.78)                            | 1.38 (1.29-1.47) | 1.27 (1.18-1.37) | 1.42 (1.25-1.62) |
| 2010-2014    | 1.59 (1.54-1.64)                            | 1.05 (0.98-1.13) | 1.08 (1.00-1.16) | 1.30 (1.15-1.48) |

C. Racial/Ethnic Disparities in LDKT Over Time – Adjusted Hazard Ratios\*

| Listing Year | Cox Model - Adjusted Hazard Ratios (95% CI) |                  |                  |                  |
|--------------|---------------------------------------------|------------------|------------------|------------------|
|              | White                                       | Black            | Hispanic         | Asian            |
| 1995-1999    | Reference                                   | 0.41 (0.38-0.43) | 0.76 (0.71-0.81) | 0.49 (0.44-0.55) |
| 2000-2004    | Reference                                   | 0.40 (0.38-0.41) | 0.62 (0.59-0.65) | 0.44 (0.40-0.47) |
| 2005-2009    | Reference                                   | 0.33 (0.31-0.34) | 0.56 (0.54-0.58) | 0.41 (0.38-0.44) |
| 2010-2014    | Reference                                   | 0.27 (0.26-0.28) | 0.51 (0.49-0.54) | 0.40 (0.38-0.43) |

LDKT = live donor kidney transplantation; ESRD = end stage renal disease.

\*Cox regression models were adjusted for differences in biologically-plausible confounders, including age (continuous), sex (male, female), body mass index ( $\leq 30$  kg/m<sup>2</sup>,  $>30$  kg/m<sup>2</sup>, missing), panel reactive antibody (continuous), ESRD etiology (diabetes, hypertension, other), and ABO blood type (O, A, B, AB).

**eTable 2.** Sensitivity analysis: models stratified by age categories, neighborhood poverty, education, and health insurance type

The tables below show the crude LDKT estimates by race/ethnicity and time cohort and the adjusted hazard ratios (HRs) from Cox models stratified by: age categories, neighborhood poverty levels, educational levels, and health insurance type. Inferences obtained from these models demonstrate the robustness of inferences from our primary models.

**Models Stratified by Age Categories**

**Table A.** Racial/Ethnic Disparities in LDKT Over Time – Age 18-44 Years

| Listing Year | Adjusted Hazard Ratios (95% CI) |                  |                  |                  |
|--------------|---------------------------------|------------------|------------------|------------------|
|              | White                           | Black            | Hispanic         | Asian            |
| 1995-1999    | Reference                       | 0.40 (0.37-0.43) | 0.81 (0.74-0.89) | 0.47 (0.40-0.55) |
| 2000-2004    | Reference                       | 0.38 (0.35-0.40) | 0.68 (0.63-0.73) | 0.48 (0.43-0.54) |
| 2005-2009    | Reference                       | 0.32 (0.30-0.34) | 0.60 (0.56-0.64) | 0.43 (0.39-0.48) |
| 2010-2014    | Reference                       | 0.25 (0.24-0.27) | 0.54 (0.51-0.58) | 0.44 (0.40-0.49) |

**Table A.** Crude LDKT Estimates – Age 18-44 Years

| Listing Year | Crude Number of LDKTs (Total Denominator; % of Denominator) |                       |                      |                     |
|--------------|-------------------------------------------------------------|-----------------------|----------------------|---------------------|
|              | White                                                       | Black                 | Hispanic             | Asian               |
| 1995-1999    | 2753<br>(16014; 17.2)                                       | 778<br>(10149; 7.7)   | 622<br>(3893; 16.0)  | 177<br>(1552; 11.4) |
| 2000-2004    | 3492<br>(12243; 28.5)                                       | 1181<br>(10764; 11.0) | 1079<br>(5270; 20.5) | 322<br>(1889; 17.0) |
| 2005-2009    | 4157<br>(13314; 31.2)                                       | 1253<br>(12805; 9.8)  | 1371<br>(7172; 19.1) | 396<br>(2392; 16.6) |
| 2010-2014    | 4102<br>(13019; 31.5)                                       | 999<br>(13301; 7.5)   | 1367<br>(7981; 17.1) | 452<br>(2779; 16.3) |

**Table B. Racial/Ethnic Disparities in LDKT Over Time – Age 45-60 Years**

|                     | <b>Adjusted Hazard Ratios (95% CI)</b> |                  |                  |                  |
|---------------------|----------------------------------------|------------------|------------------|------------------|
| <b>Listing Year</b> | <b>White</b>                           | <b>Black</b>     | <b>Hispanic</b>  | <b>Asian</b>     |
| 1995-1999           | Reference                              | 0.38 (0.35-0.42) | 0.65 (0.58-0.74) | 0.47 (0.39-0.57) |
| 2000-2004           | Reference                              | 0.39 (0.36-0.42) | 0.54 (0.50-0.59) | 0.38 (0.33-0.43) |
| 2005-2009           | Reference                              | 0.31 (0.29-0.33) | 0.49 (0.46-0.53) | 0.40 (0.36-0.45) |
| 2010-2014           | Reference                              | 0.27 (0.26-0.29) | 0.46 (0.43-0.50) | 0.38 (0.34-0.42) |

**Table B. Crude LDKT Estimates – Age 45-60 Years**

|                     | <b>Crude Number of LDKTs (Total Denominator; % of Denominator)</b> |                      |                     |                    |
|---------------------|--------------------------------------------------------------------|----------------------|---------------------|--------------------|
| <b>Listing Year</b> | <b>White</b>                                                       | <b>Black</b>         | <b>Hispanic</b>     | <b>Asian</b>       |
| 1995-1999           | 2135<br>(18095; 11.8)                                              | 449<br>(9814; 4.6)   | 307<br>(3784; 8.1)  | 109<br>(1665; 6.5) |
| 2000-2004           | 3994<br>(21527; 18.5)                                              | 950<br>(13119; 7.2)  | 665<br>(6420; 10.4) | 206<br>(2545; 8.1) |
| 2005-2009           | 5379<br>(27376; 19.6)                                              | 1047<br>(17915; 5.8) | 896<br>(9750; 9.2)  | 315<br>(3661; 8.6) |
| 2010-2014           | 5136<br>(27350; 18.8)                                              | 983<br>(20368; 4.8)  | 989<br>(12179; 8.1) | 340<br>(4449; 7.6) |

**Table C. Racial/Ethnic Disparities in LDKT Over Time – Age >60 Years**

|                     | <b>Adjusted Hazard Ratios (95% CI)</b> |                  |                  |                  |
|---------------------|----------------------------------------|------------------|------------------|------------------|
| <b>Listing Year</b> | <b>White</b>                           | <b>Black</b>     | <b>Hispanic</b>  | <b>Asian</b>     |
| 1995-1999           | Reference                              | 0.56 (0.46-0.68) | 0.72 (0.56-0.92) | 0.66 (0.46-0.96) |
| 2000-2004           | Reference                              | 0.50 (0.44-0.56) | 0.59 (0.51-0.68) | 0.43 (0.34-0.54) |
| 2005-2009           | Reference                              | 0.39 (0.35-0.43) | 0.56 (0.50-0.62) | 0.34 (0.28-0.41) |
| 2010-2014           | Reference                              | 0.30 (0.27-0.34) | 0.52 (0.47-0.57) | 0.36 (0.31-0.42) |

**Table C. Crude LDKT Estimates – Age >60 Years**

|                     | <b>Crude Number of LDKTs (Total Denominator; % of Denominator)</b> |                  |                 |                 |
|---------------------|--------------------------------------------------------------------|------------------|-----------------|-----------------|
| <b>Listing Year</b> | <b>White</b>                                                       | <b>Black</b>     | <b>Hispanic</b> | <b>Asian</b>    |
| 1995-1999           | 584 (8101; 7.2)                                                    | 124 (2892; 4.3)  | 70 (1260; 5.6)  | 30 (554; 5.4)   |
| 2000-2004           | 1610 (12863; 12.5)                                                 | 314 (4911; 6.4)  | 219 (2859; 7.7) | 77 (1293; 6.0)  |
| 2005-2009           | 2757 (21078; 13.1)                                                 | 418 (8286; 5.0)  | 361 (4996; 7.2) | 123 (2510; 4.9) |
| 2010-2014           | 3410 (26060; 13.1)                                                 | 430 (11009; 3.9) | 411 (6348; 6.5) | 177 (3588; 4.9) |

**Sensitivity Analysis: Models Stratified by Neighborhood Poverty Levels**

**Table A. Racial/Ethnic Disparities in LDKT Over Time – Neighborhood Poverty Level <5%**

|                     | <b>Adjusted Hazard Ratios (95% CI)</b> |                  |                  |                  |
|---------------------|----------------------------------------|------------------|------------------|------------------|
| <b>Listing Year</b> | <b>White</b>                           | <b>Black</b>     | <b>Hispanic</b>  | <b>Asian</b>     |
| 1995-1999           | Reference                              | 0.54 (0.42-0.70) | 1.04 (0.74-1.46) | 0.49 (0.39-0.62) |
| 2000-2004           | Reference                              | 0.49 (0.40-0.58) | 0.80 (0.63-1.02) | 0.44 (0.37-0.51) |
| 2005-2009           | Reference                              | 0.44 (0.38-0.51) | 0.79 (0.66-0.96) | 0.43 (0.38-0.48) |
| 2010-2014           | Reference                              | 0.38 (0.33-0.45) | 0.77 (0.65-0.91) | 0.42 (0.37-0.47) |

**Table A. Crude LDKT Estimates – Neighborhood Poverty <5%**

|                     | <b>Crude Number of LDKTs (Total Denominator; % of Denominator)</b> |                  |                 |                  |
|---------------------|--------------------------------------------------------------------|------------------|-----------------|------------------|
| <b>Listing Year</b> | <b>White</b>                                                       | <b>Black</b>     | <b>Hispanic</b> | <b>Asian</b>     |
| 1995-1999           | 1263 (8075; 15.6)                                                  | 61 (647; 9.4)    | 35 (203; 17.2)  | 76 (785; 9.7)    |
| 2000-2004           | 2085 (9299; 22.4)                                                  | 123 (966; 12.7)  | 65 (312; 20.8)  | 160 (1321; 12.1) |
| 2005-2009           | 3073 (12911; 23.8)                                                 | 177 (1522; 11.6) | 111 (531; 20.9) | 263 (2162; 12.2) |
| 2010-2014           | 3314 (14671; 22.6)                                                 | 184 (1973; 9.3)  | 140 (733; 19.1) | 305 (2782; 11.0) |

**Table B. Racial/Ethnic Disparities in LDKT Over Time – Neighborhood Poverty Level 5-19%**

|                     | <b>Adjusted Hazard Ratios (95% CI)</b> |                  |                  |                  |
|---------------------|----------------------------------------|------------------|------------------|------------------|
| <b>Listing Year</b> | <b>White</b>                           | <b>Black</b>     | <b>Hispanic</b>  | <b>Asian</b>     |
| 1995-1999           | Reference                              | 0.51 (0.46-0.56) | 0.91 (0.81-1.02) | 0.49 (0.42-0.57) |
| 2000-2004           | Reference                              | 0.50 (0.47-0.54) | 0.71 (0.65-0.77) | 0.45 (0.40-0.50) |
| 2005-2009           | Reference                              | 0.42 (0.39-0.45) | 0.68 (0.64-0.73) | 0.39 (0.35-0.43) |
| 2010-2014           | Reference                              | 0.35 (0.33-0.38) | 0.65 (0.61-0.70) | 0.43 (0.39-0.46) |

**Table B. Crude LDKT Estimates – Neighborhood Poverty 5-19%**

|                     | <b>Crude Number of LDKTs (Total Denominator; % of Denominator)</b> |                   |                   |                  |
|---------------------|--------------------------------------------------------------------|-------------------|-------------------|------------------|
| <b>Listing Year</b> | <b>White</b>                                                       | <b>Black</b>      | <b>Hispanic</b>   | <b>Asian</b>     |
| 1995-1999           | 3626 (28867; 12.6)                                                 | 424 (5791; 7.3)   | 317 (2460; 12.9)  | 168 (2067; 8.1)  |
| 2000-2004           | 6267 (32561; 19.2)                                                 | 852 (7877; 10.8)  | 639 (4152; 15.4)  | 341 (3212; 10.6) |
| 2005-2009           | 8311 (43469; 19.1)                                                 | 1057 (12089; 8.7) | 924 (6507; 14.2)  | 428 (4818; 8.9)  |
| 2010-2014           | 8428 (46408; 18.2)                                                 | 982 (14597; 6.7)  | 1028 (8127; 12.6) | 528 (5922; 8.9)  |

**Table C. Racial/Ethnic Disparities in LDKT Over Time – Neighborhood Poverty Level ≥20%**

|                     | <b>Adjusted Hazard Ratios (95% CI)</b> |                  |                  |                  |
|---------------------|----------------------------------------|------------------|------------------|------------------|
| <b>Listing Year</b> | <b>White</b>                           | <b>Black</b>     | <b>Hispanic</b>  | <b>Asian</b>     |
| 1995-1999           | Reference                              | 0.45 (0.40-0.51) | 0.84 (0.74-0.96) | 0.49 (0.36-0.66) |
| 2000-2004           | Reference                              | 0.44 (0.40-0.49) | 0.75 (0.68-0.83) | 0.42 (0.33-0.53) |
| 2005-2009           | Reference                              | 0.32 (0.30-0.36) | 0.60 (0.55-0.66) | 0.39 (0.32-0.48) |
| 2010-2014           | Reference                              | 0.26 (0.24-0.28) | 0.53 (0.48-0.58) | 0.32 (0.26-0.39) |

**Table C. Crude LDKT Estimates – Neighborhood Poverty Level  $\geq 20\%$**

|                     | <b>Crude Number of LDKTs (Total Denominator; % of Denominator)</b> |                   |                    |                 |
|---------------------|--------------------------------------------------------------------|-------------------|--------------------|-----------------|
| <b>Listing Year</b> | <b>White</b>                                                       | <b>Black</b>      | <b>Hispanic</b>    | <b>Asian</b>    |
| 1995-1999           | 351 (3293; 10.7)                                                   | 808 (15353; 5.3)  | 585 (5828; 10.0)   | 48 (711; 6.8)   |
| 2000-2004           | 558 (3606; 15.5)                                                   | 1406 (19150; 7.3) | 1192 (9559; 12.5)  | 83 (997; 8.3)   |
| 2005-2009           | 693 (4170; 16.6)                                                   | 1407 (24491; 5.7) | 1512 (14360; 10.5) | 115 (1401; 8.2) |
| 2010-2014           | 710 (4315; 16.5)                                                   | 1200 (27259; 4.4) | 1537 (17202; 8.9)  | 121 (1930; 6.3) |

**Sensitivity Analysis: Models Stratified by Educational Status**

**Table A. Racial/Ethnic Disparities in LDKT Over Time – No College Degree**

|                     | <b>Adjusted Hazard Ratios (95% CI)</b> |                  |                  |                  |
|---------------------|----------------------------------------|------------------|------------------|------------------|
| <b>Listing Year</b> | <b>White</b>                           | <b>Black</b>     | <b>Hispanic</b>  | <b>Asian</b>     |
| 1995-1999           | Reference                              | 0.41 (0.38-0.44) | 0.74 (0.68-0.81) | 0.52 (0.44-0.61) |
| 2000-2004           | Reference                              | 0.39 (0.37-0.41) | 0.64 (0.60-0.68) | 0.40 (0.35-0.45) |
| 2005-2009           | Reference                              | 0.32 (0.30-0.34) | 0.59 (0.56-0.62) | 0.40 (0.36-0.44) |
| 2010-2014           | Reference                              | 0.26 (0.25-0.28) | 0.54 (0.52-0.57) | 0.34 (0.31-0.38) |

**Table A. Crude LDKT Estimates – No College Degree**

|                     | <b>Crude Number of LDKTs (Total Denominator; % of Denominator)</b> |                   |                    |                 |
|---------------------|--------------------------------------------------------------------|-------------------|--------------------|-----------------|
| <b>Listing Year</b> | <b>White</b>                                                       | <b>Black</b>      | <b>Hispanic</b>    | <b>Asian</b>    |
| 1995-1999           | 3006 (24519; 12.3)                                                 | 849 (15124; 5.6)  | 640 (6212; 10.3)   | 148 (1765; 8.4) |
| 2000-2004           | 5233 (28244; 18.5)                                                 | 1500 (19243; 7.8) | 1369 (10621; 12.9) | 292 (3197; 9.1) |
| 2005-2009           | 7164 (39070; 18.3)                                                 | 1734 (28053; 6.2) | 1979 (17380; 11.4) | 422 (4838; 8.7) |
| 2010-2014           | 7434 (42996; 17.3)                                                 | 1572 (33520; 4.7) | 2204 (22494; 9.8)  | 423 (6176; 6.8) |



**Table B. Racial/Ethnic Disparities in LDKT Over Time – College Degree**

|                     | <b>Adjusted Hazard Ratios (95% CI)</b> |                  |                  |                  |
|---------------------|----------------------------------------|------------------|------------------|------------------|
| <b>Listing Year</b> | <b>White</b>                           | <b>Black</b>     | <b>Hispanic</b>  | <b>Asian</b>     |
| 1995-1999           | Reference                              | 0.44 (0.37-0.53) | 1.02 (0.82-1.27) | 0.46 (0.36-0.60) |
| 2000-2004           | Reference                              | 0.42 (0.37-0.48) | 0.57 (0.47-0.69) | 0.41 (0.34-0.50) |
| 2005-2009           | Reference                              | 0.38 (0.35-0.42) | 0.59 (0.51-0.67) | 0.38 (0.33-0.44) |
| 2010-2014           | Reference                              | 0.29 (0.26-0.32) | 0.57 (0.51-0.64) | 0.43 (0.38-0.48) |

**Table B. Crude LDKT Estimates – College Degree**

|                     | <b>Crude Number of LDKTs (Total Denominator; % of Denominator)</b> |                  |                  |                  |
|---------------------|--------------------------------------------------------------------|------------------|------------------|------------------|
| <b>Listing Year</b> | <b>White</b>                                                       | <b>Black</b>     | <b>Hispanic</b>  | <b>Asian</b>     |
| 1995-1999           | 874 (5512; 15.9)                                                   | 147 (1819; 8.1)  | 88 (519; 17.0)   | 66 (633; 10.4)   |
| 2000-2004           | 1590 (6429; 24.7)                                                  | 316 (2579; 12.3) | 122 (759; 16.1)  | 103 (800; 12.9)  |
| 2005-2009           | 2494 (10278; 24.3)                                                 | 491 (4645; 10.6) | 238 (1414; 16.8) | 208 (1809; 11.5) |
| 2010-2014           | 3195 (13633; 23.4)                                                 | 495 (6639; 7.5)  | 340 (2194; 15.5) | 329 (2778; 11.8) |

**Sensitivity Analysis: Models Stratified by Health Insurance Type****Table A. Racial/Ethnic Disparities in LDKT Over Time – Private Health Insurance**

|                     | <b>Adjusted Hazard Ratios (95% CI)</b> |                  |                  |                  |
|---------------------|----------------------------------------|------------------|------------------|------------------|
| <b>Listing Year</b> | <b>White</b>                           | <b>Black</b>     | <b>Hispanic</b>  | <b>Asian</b>     |
| 1995-1999           | Reference                              | 0.47 (0.43-0.51) | 0.87 (0.79-0.96) | 0.53 (0.46-0.61) |
| 2000-2004           | Reference                              | 0.47 (0.44-0.49) | 0.72 (0.67-0.77) | 0.42 (0.38-0.47) |
| 2005-2009           | Reference                              | 0.38 (0.36-0.40) | 0.65 (0.61-0.69) | 0.40 (0.37-0.44) |
| 2010-2014           | Reference                              | 0.32 (0.30-0.34) | 0.60 (0.57-0.63) | 0.42 (0.38-0.45) |

**Table A. Crude LDKT Estimates – Private Health Insurance**

|                     | <b>Crude Number of LDKTs (Total Denominator; % of Denominator)</b> |                    |                   |                  |
|---------------------|--------------------------------------------------------------------|--------------------|-------------------|------------------|
| <b>Listing Year</b> | <b>White</b>                                                       | <b>Black</b>       | <b>Hispanic</b>   | <b>Asian</b>     |
| 1995-1999           | 3746 (21600; 17.3)                                                 | 657 (7211; 9.1)    | 436 (2582; 16.9)  | 207 (1706; 12.1) |
| 2000-2004           | 6311 (25062; 25.2)                                                 | 1357 (10390; 13.1) | 955 (4646; 20.6)  | 399 (2921; 13.7) |
| 2005-2009           | 8697 (33537; 25.9)                                                 | 1574 (14787; 10.6) | 1342 (7347; 18.3) | 591 (4579; 12.9) |
| 2010-2014           | 8812 (34418; 25.6)                                                 | 1405 (16381; 8.6)  | 1475 (9068; 16.3) | 689 (5458; 12.6) |

**Table B. Racial/Ethnic Disparities in LDKT Over Time – Medicare Insurance**

|                     | <b>Adjusted Hazard Ratios (95% CI)</b> |                  |                  |                  |
|---------------------|----------------------------------------|------------------|------------------|------------------|
| <b>Listing Year</b> | <b>White</b>                           | <b>Black</b>     | <b>Hispanic</b>  | <b>Asian</b>     |
| 1995-1999           | Reference                              | 0.47 (0.43-0.52) | 0.86 (0.77-0.97) | 0.48 (0.38-0.61) |
| 2000-2004           | Reference                              | 0.41 (0.38-0.45) | 0.68 (0.63-0.75) | 0.49 (0.41-0.58) |
| 2005-2009           | Reference                              | 0.34 (0.32-0.37) | 0.66 (0.61-0.71) | 0.44 (0.37-0.51) |
| 2010-2014           | Reference                              | 0.28 (0.26-0.30) | 0.58 (0.54-0.62) | 0.41 (0.36-0.47) |

**Table B. Crude LDKT Estimates – Medicare Insurance**

|                     | <b>Crude Number of LDKTs (Total Denominator; % of Denominator)</b> |                  |                  |                 |
|---------------------|--------------------------------------------------------------------|------------------|------------------|-----------------|
| <b>Listing Year</b> | <b>White</b>                                                       | <b>Black</b>     | <b>Hispanic</b>  | <b>Asian</b>    |
| 1995-1999           | 1396 (17370; 8.0)                                                  | 544 (12744; 4.3) | 380 (4879; 7.8)  | 69 (1375; 5.0)  |
| 2000-2004           | 2257 (18166; 12.4)                                                 | 810 (14688; 5.5) | 670 (7416; 9.0)  | 138 (1927; 7.2) |
| 2005-2009           | 2945 (24056; 12.2)                                                 | 891 (19977; 4.5) | 926 (10995; 8.4) | 171 (2791; 6.1) |
| 2010-2014           | 3286 (27732; 11.8)                                                 | 797 (23302; 3.4) | 966 (13859; 7.0) | 212 (3981; 5.3) |

**Table C. Racial/Ethnic Disparities in LDKT Over Time – Medicaid Insurance or Uninsured**

|                     | <b>Adjusted Hazard Ratios (95% CI)</b> |                  |                  |                  |
|---------------------|----------------------------------------|------------------|------------------|------------------|
| <b>Listing Year</b> | <b>White</b>                           | <b>Black</b>     | <b>Hispanic</b>  | <b>Asian</b>     |
| 1995-1999           | Reference                              | 0.47 (0.37-0.59) | 1.20 (0.97-1.47) | 0.45 (0.31-0.67) |
| 2000-2004           | Reference                              | 0.50 (0.41-0.60) | 0.92 (0.78-1.09) | 0.46 (0.34-0.62) |
| 2005-2009           | Reference                              | 0.32 (0.27-0.38) | 0.58 (0.50-0.67) | 0.36 (0.27-0.47) |
| 2010-2014           | Reference                              | 0.33 (0.27-0.40) | 0.64 (0.55-0.75) | 0.37 (0.28-0.48) |

**Table C. Crude LDKT Estimates – Medicaid Insurance or Uninsured**

|                     | <b>Crude Number of LDKTs (Total Denominator; % of Denominator)</b> |                 |                  |                |
|---------------------|--------------------------------------------------------------------|-----------------|------------------|----------------|
| <b>Listing Year</b> | <b>White</b>                                                       | <b>Black</b>    | <b>Hispanic</b>  | <b>Asian</b>   |
| 1995-1999           | 208 (2100; 9.9)                                                    | 118 (2275; 5.2) | 165 (1307; 12.6) | 29 (557; 5.2)  |
| 2000-2004           | 267 (2020; 13.2)                                                   | 184 (2601; 7.1) | 290 (2241; 12.9) | 49 (749; 6.5)  |
| 2005-2009           | 424 (2741; 15.5)                                                   | 173 (3181; 5.4) | 311 (3187; 9.8)  | 61 (1043; 5.8) |
| 2010-2014           | 373 (2746; 13.6)                                                   | 162 (3654; 4.4) | 289 (3205; 9.0)  | 62 (1215; 5.1) |

LDKT = live donor kidney transplantation; HR = hazard ratio; ESRD = end stage renal disease.

\*Cox regression models were adjusted for differences in biologically-plausible confounders, including age (continuous), sex (male, female), body mass index ( $\leq 30$  kg/m<sup>2</sup>,  $>30$  kg/m<sup>2</sup>, missing), panel reactive antibody (continuous), ESRD etiology (diabetes, hypertension, other), and ABO blood type (O, A, B, AB).

**eTable 3.** Sensitivity analysis: contemporary reference cohort

The tables below show the **A)** crude LDKT estimates by race/ethnicity and time cohort and the adjusted hazard ratios (HRs) from Cox models: **B)** comparing LDKT access in recent cohorts to a contemporary reference cohort (2000-2002) by race/ethnicity and **C)** comparing racial/ethnic disparities in LDKT by time cohort. Inferences obtained from these models are similar to inferences obtained from our primary models.

**A. Crude LDKT Estimates**

|                     | <b>Crude Number of LDKTs (Total Denominator; % of Denominator)</b> |                   |                    |                  |
|---------------------|--------------------------------------------------------------------|-------------------|--------------------|------------------|
| <b>Listing Year</b> | <b>White</b>                                                       | <b>Black</b>      | <b>Hispanic</b>    | <b>Asian</b>     |
| 2000-2002           | 5044 (27010; 18.7)                                                 | 1344 (16451; 8.2) | 1057 (7753; 13.6)  | 334 (3086; 10.8) |
| 2003-2005           | 6415 (30968; 20.7)                                                 | 1632 (19228; 8.5) | 1368 (10548; 13.0) | 431 (4225; 10.2) |
| 2006-2008           | 7259 (37473; 19.4)                                                 | 1614 (23678; 6.8) | 1571 (13242; 11.9) | 493 (5152; 9.6)  |
| 2009-2011           | 7760 (39100; 19.8)                                                 | 1591 (25742; 6.2) | 1674 (14735; 11.4) | 531 (5737; 9.3)  |
| 2012-2014           | 7559 (40279; 18.8)                                                 | 1394 (27379; 5.1) | 1688 (16697; 10.1) | 619 (6906; 9.0)  |

**B. Temporal Changes in LDKT Access – Adjusted Hazard Ratios\***

|                     | <b>Adjusted Hazard Ratios (95% CI)</b> |                  |                  |                  |
|---------------------|----------------------------------------|------------------|------------------|------------------|
| <b>Listing Year</b> | <b>White</b>                           | <b>Black</b>     | <b>Hispanic</b>  | <b>Asian</b>     |
| 2000-2002           | Reference                              | Reference        | Reference        | Reference        |
| 2003-2005           | 1.21 (1.17-1.26)                       | 1.12 (1.05-1.21) | 1.03 (0.95-1.12) | 1.05 (0.91-1.21) |
| 2006-2008           | 1.18 (1.14-1.23)                       | 0.97 (0.91-1.05) | 1.04 (0.96-1.12) | 1.06 (0.92-1.22) |
| 2009-2011           | 1.17 (1.13-1.21)                       | 0.87 (0.81-0.93) | 0.97 (0.90-1.05) | 1.01 (0.88-1.16) |
| 2012-2014           | 1.10 (1.07-1.14)                       | 0.71 (0.66-0.77) | 0.85 (0.79-0.92) | 0.98 (0.86-1.12) |

**C. Racial/Ethnic Disparities in LDKT Over Time – Adjusted Hazard Ratios\***

|                     | <b>Adjusted Hazard Ratios (95% CI)</b> |                  |                  |                  |
|---------------------|----------------------------------------|------------------|------------------|------------------|
| <b>Listing Year</b> | <b>White</b>                           | <b>Black</b>     | <b>Hispanic</b>  | <b>Asian</b>     |
| 2000-2002           | Reference                              | 0.40 (0.38-0.43) | 0.66 (0.61-0.70) | 0.46 (0.41-0.52) |
| 2003-2005           | Reference                              | 0.37 (0.35-0.39) | 0.56 (0.53-0.59) | 0.40 (0.36-0.44) |
| 2006-2008           | Reference                              | 0.33 (0.31-0.35) | 0.58 (0.54-0.61) | 0.41 (0.38-0.45) |
| 2009-2011           | Reference                              | 0.30 (0.28-0.31) | 0.54 (0.52-0.57) | 0.40 (0.37-0.44) |
| 2012-2014           | Reference                              | 0.26 (0.25-0.28) | 0.51 (0.48-0.53) | 0.41 (0.38-0.45) |

LDKT = live donor kidney transplantation; HR = hazard ratio; ESRD = end stage renal disease.

\* Cox regression models were adjusted for differences in biologically-plausible confounders, including age (continuous), sex (male, female), body mass index ( $\leq 30$  kg/m<sup>2</sup>,  $>30$  kg/m<sup>2</sup>, missing), panel reactive antibody (continuous), ESRD etiology (diabetes, hypertension, other), and ABO blood type (O, A, B, AB).

**eTable 4.** Sensitivity analysis: inclusion of non-waitlisted LDKT recipients

The tables below show results for both the waitlisted candidates and non-waitlisted LDKT recipients, including the **A)** crude LDKT estimates by race/ethnicity and time cohort and the adjusted hazard ratios (HRs) from competing risk models: **B)** comparing LDKT in recent cohorts to the earliest cohort (1995-1999) by race/ethnicity and **C)** comparing racial/ethnic disparities in LDKT by time cohort.

**A. Crude LDKT Estimates**

|                     | <b>Crude Number of LDKTs (Total Denominator; % of Denominator)</b> |                       |                       |                      |
|---------------------|--------------------------------------------------------------------|-----------------------|-----------------------|----------------------|
| <b>Listing Year</b> | <b>White</b>                                                       | <b>Black</b>          | <b>Hispanic</b>       | <b>Asian</b>         |
| 1995-1999           | 11669<br>(48407; 24.1)                                             | 2406<br>(23910; 10.1) | 1932<br>(9870; 19.6)  | 480<br>(3935; 12.2)  |
| 2000-2004           | 16232<br>(53769; 30.2)                                             | 3629<br>(29978; 12.1) | 2936<br>(15522; 18.9) | 847<br>(5969; 14.2)  |
| 2005-2009           | 16295<br>(65770; 24.8)                                             | 3407<br>(39695; 8.6)  | 3199<br>(22489; 14.2) | 962<br>(8691; 11.1)  |
| 2010-2014           | 14051<br>(67832; 20.7)                                             | 2639<br>(44905; 5.9)  | 2963<br>(26704; 11.1) | 1022<br>(10869; 9.4) |

**B. Temporal Changes in LDKT – Adjusted Sub-Hazard Ratios\***

|                     | <b>Competing Risk Model - Adjusted Sub-Hazard Ratios (95% CI)</b> |                  |                  |                  |
|---------------------|-------------------------------------------------------------------|------------------|------------------|------------------|
| <b>Listing Year</b> | <b>White</b>                                                      | <b>Black</b>     | <b>Hispanic</b>  | <b>Asian</b>     |
| 1995-1999           | Reference                                                         | Reference        | Reference        | Reference        |
| 2000-2004           | 1.39 (1.36-1.42)                                                  | 1.31 (1.24-1.38) | 1.04 (0.98-1.10) | 1.31 (1.17-1.46) |
| 2005-2009           | 1.24 (1.21-1.27)                                                  | 1.04 (0.99-1.10) | 0.87 (0.83-0.92) | 1.15 (1.03-1.28) |
| 2010-2014           | 1.02 (1.00-1.05)                                                  | 0.72 (0.68-0.76) | 0.67 (0.64-0.71) | 0.98 (0.88-1.09) |

C. Racial/Ethnic Disparities in LDKT Over Time – Adjusted Sub-Hazard Ratios\*

|                     | <b>Competing Risk Model - Adjusted Sub-Hazard Ratios (95% CI)</b> |                  |                  |                  |
|---------------------|-------------------------------------------------------------------|------------------|------------------|------------------|
| <b>Listing Year</b> | <b>White</b>                                                      | <b>Black</b>     | <b>Hispanic</b>  | <b>Asian</b>     |
| 1995-1999           | Reference                                                         | 0.40 (0.38-0.41) | 0.78 (0.74-0.81) | 0.43 (0.39-0.47) |
| 2000-2004           | Reference                                                         | 0.37 (0.36-0.39) | 0.58 (0.56-0.60) | 0.40 (0.38-0.43) |
| 2005-2009           | Reference                                                         | 0.33 (0.32-0.34) | 0.55 (0.53-0.57) | 0.40 (0.37-0.42) |
| 2010-2014           | Reference                                                         | 0.28 (0.27-0.29) | 0.51 (0.49-0.53) | 0.41 (0.39-0.44) |

LDKT = live donor kidney transplantation; ESRD = end stage renal disease.

\*Competing risk models were adjusted for differences in biologically-plausible confounders, including age (continuous), sex (male, female), body mass index ( $\leq 30$  kg/m<sup>2</sup>,  $>30$  kg/m<sup>2</sup>, missing), panel reactive antibody (continuous), ESRD etiology (diabetes, hypertension, other), and ABO blood type (O, A, B, AB).

**eTable 5.** Sensitivity analysis: restricted to active status waitlist candidates

The tables below show results for active status-only waitlist candidates, including the **A)** crude LDKT estimates by race/ethnicity and time cohort and the adjusted hazard ratios (HRs) from Cox models: **B)** comparing LDKT in recent cohorts to the earliest cohort (1995-1999) by race/ethnicity and **C)** comparing racial/ethnic disparities in LDKT by time cohort. Inferences obtained from these models are similar to inferences from our primary models.

**A. Crude LDKT Estimates**

|                     | <b>Crude Number of LDKTs (Total Denominator; % of Denominator)</b> |                   |                    |                  |
|---------------------|--------------------------------------------------------------------|-------------------|--------------------|------------------|
| <b>Listing Year</b> | <b>White</b>                                                       | <b>Black</b>      | <b>Hispanic</b>    | <b>Asian</b>     |
| 1995-1999           | 5437 (42090; 12.9)                                                 | 1351 (22817; 5.9) | 986 (8934; 11.0)   | 315 (3783; 8.3)  |
| 2000-2004           | 8966 (45915; 19.5)                                                 | 2411 (28313; 8.5) | 1942 (14301; 13.6) | 597 (5626; 10.6) |
| 2005-2009           | 11378 (55990; 20.3)                                                | 2596 (34420; 7.5) | 2482 (19590; 12.7) | 774 (7934; 9.8)  |
| 2010-2014           | 11528 (58358; 19.8)                                                | 2311 (38889; 5.9) | 2581 (23064; 11.2) | 886 (9257; 9.6)  |

**B. Temporal Changes in LDKT Access (Active Status Candidates) – Adjusted Hazard Ratios\***

|                     | <b>Adjusted Hazard Ratios (95% CI)</b> |                  |                  |                  |
|---------------------|----------------------------------------|------------------|------------------|------------------|
| <b>Listing Year</b> | <b>White</b>                           | <b>Black</b>     | <b>Hispanic</b>  | <b>Asian</b>     |
| 1995-1999           | Reference                              | Reference        | Reference        | Reference        |
| 2000-2004           | 1.53 (1.48-1.59)                       | 1.47 (1.38-1.58) | 1.26 (1.17-1.37) | 1.36 (1.19-1.56) |
| 2005-2009           | 1.82 (1.76-1.88)                       | 1.51 (1.42-1.62) | 1.37 (1.28-1.48) | 1.44 (1.26-1.64) |
| 2010-2014           | 1.72 (1.67-1.78)                       | 1.19 (1.12-1.28) | 1.19 (1.11-1.28) | 1.43 (1.26-1.63) |



**C. Racial/Ethnic Disparities in LDKT Over Time (Active Status Candidates) – Adjusted Hazard Ratios\***

|                     | <b>Adjusted Hazard Ratios (95% CI)</b> |                  |                  |                  |
|---------------------|----------------------------------------|------------------|------------------|------------------|
| <b>Listing Year</b> | <b>White</b>                           | <b>Black</b>     | <b>Hispanic</b>  | <b>Asian</b>     |
| 1995-1999           | Reference                              | 0.41 (0.39-0.44) | 0.76 (0.71-0.81) | 0.50 (0.44-0.56) |
| 2000-2004           | Reference                              | 0.40 (0.38-0.41) | 0.62 (0.59-0.65) | 0.44 (0.41-0.48) |
| 2005-2009           | Reference                              | 0.34 (0.33-0.36) | 0.57 (0.55-0.60) | 0.39 (0.36-0.42) |
| 2010-2014           | Reference                              | 0.28 (0.27-0.30) | 0.52 (0.50-0.55) | 0.41 (0.38-0.44) |

LDKT = live donor kidney transplantation; HR = hazard ratio; ESRD = end stage renal disease.

\*Cox regression models were adjusted for differences in biologically-plausible confounders, including age (continuous), sex (male, female), body mass index ( $\leq 30$  kg/m<sup>2</sup>,  $>30$  kg/m<sup>2</sup>, missing), panel reactive antibody (continuous), ESRD etiology (diabetes, hypertension, other), and ABO blood type (O, A, B, AB).

**eTable 6.** Characteristics of LDKT recipients and donors by race/ethnicity, from 1995-1999 to 2010-2014\*

|                                        | White Recipients |                  |                 | Black Recipients |                |                | Hispanic Recipients |                |                | Asian Recipients |                |               |
|----------------------------------------|------------------|------------------|-----------------|------------------|----------------|----------------|---------------------|----------------|----------------|------------------|----------------|---------------|
|                                        | 1995-1999        | 2000-2009        | 2010-2014       | 1995-1999        | 2000-2009      | 2010-2014      | 1995-1999           | 2000-2009      | 2010-2014      | 1995-1999        | 2000-2009      | 2010-2014     |
| <b>LDKT Recipient Characteristics</b>  |                  |                  |                 |                  |                |                |                     |                |                |                  |                |               |
| <b>Total Ns:</b>                       | 4,765            | 22,498           | 16,694          | 1,196            | 5,891          | 3,697          | 862                 | 5,057          | 3,963          | 270              | 1,661          | 1,430         |
| <b>Age ≥ 60 years, n (%)</b>           | 587<br>(12.3)    | 5388<br>(23.9)   | 5196<br>(31.1)  | 122<br>(10.2)    | 966<br>(16.4)  | 756<br>(20.4)  | 76<br>(8.8)         | 766<br>(15.1)  | 728<br>(18.4)  | 35<br>(13.0)     | 277<br>(16.7)  | 335<br>(23.4) |
| <b>Sex, male, n (%)</b>                | 2874<br>(60.3)   | 14036<br>(62.4)  | 10769<br>(64.5) | 653<br>(54.6)    | 3236<br>(54.9) | 2147<br>(58.1) | 522<br>(60.6)       | 3102<br>(61.3) | 2512<br>(63.4) | 133<br>(49.3)    | 905<br>(54.5)  | 799<br>(55.9) |
| <b>College degree or higher, n (%)</b> | 1078<br>(29.3)   | 6183<br>(32.2)   | 6335<br>(39.2)  | 178<br>(18.7)    | 1176<br>(24.1) | 1132<br>(31.9) | 98<br>(15.2)        | 500<br>(11.9)  | 648<br>(17.1)  | 92<br>(43.0)     | 544<br>(39.4)  | 711<br>(51.9) |
| <b>LDKT Candidate Type, n (%)</b>      |                  |                  |                 |                  |                |                |                     |                |                |                  |                |               |
| No Dialysis – Preemptive LDKT          | 1925<br>(40.4)   | 10,255<br>(45.6) | 9384<br>(56.2)  | 267<br>(22.3)    | 1505<br>(25.5) | 1234<br>(33.4) | 209<br>(24.2)       | 1208<br>(23.9) | 1276<br>(32.2) | 92<br>(34.1)     | 567<br>(34.1)  | 678<br>(47.4) |
| Dialysis – DDKT waitlist               | 2840<br>(59.6)   | 12,243<br>(54.4) | 7310<br>(43.8)  | 929<br>(77.7)    | 4386<br>(74.4) | 2463<br>(66.6) | 653<br>(75.7)       | 3849<br>(76.1) | 2687<br>(67.8) | 178<br>(65.9)    | 1094<br>(65.9) | 752<br>(52.6) |
| <b>LDKT Donor Characteristics</b>      |                  |                  |                 |                  |                |                |                     |                |                |                  |                |               |
| <b>Total Ns:</b>                       | 4,765            | 22,498           | 16,694          | 1,196            | 5,891          | 3,697          | 862                 | 5,057          | 3,963          | 270              | 1,661          | 1,430         |
| <b>Age ≥ 60 years, n (%)</b>           | 245<br>(5.1)     | 1319<br>(5.9)    | 1700<br>(10.2)  | 16<br>(1.3)      | 115<br>(1.9)   | 149<br>(4.0)   | 20<br>(2.3)         | 104<br>(2.1)   | 152<br>(3.8)   | 12<br>(4.4)      | 69<br>(4.1)    | 126<br>(8.8)  |
| <b>Sex, male, n (%)</b>                | 1954<br>(41.0)   | 8942<br>(39.7)   | 6234<br>(37.3)  | 490<br>(41.0)    | 2436<br>(41.3) | 1392<br>(37.6) | 385<br>(44.8)       | 2141<br>(42.3) | 1487<br>(37.5) | 134<br>(49.6)    | 737<br>(44.4)  | 547<br>(38.2) |
| <b>Race/ethnicity</b>                  |                  |                  |                 |                  |                |                |                     |                |                |                  |                |               |
| Same as recipient, n (%)               | 4575<br>(96.0)   | 21563<br>(95.8)  | 15749<br>(94.3) | 1080<br>(90.3)   | 4972<br>(84.4) | 2645<br>(71.5) | 696<br>(80.7)       | 4292<br>(84.9) | 3102<br>(78.3) | 177<br>(65.6)    | 1156<br>(69.6) | 860<br>(60.1) |

|                                                                    | White Recipients |                 |                | Black Recipients |                |                | Hispanic Recipients |                |                | Asian Recipients |                |               |
|--------------------------------------------------------------------|------------------|-----------------|----------------|------------------|----------------|----------------|---------------------|----------------|----------------|------------------|----------------|---------------|
| <b>Relationship to recipient, n (%)</b>                            |                  |                 |                |                  |                |                |                     |                |                |                  |                |               |
| Biological relative                                                | 3433<br>(73.0)   | 12651<br>(56.2) | 7445<br>(44.6) | 970<br>(81.9)    | 4027<br>(68.4) | 1911<br>(51.7) | 688<br>(80.4)       | 3562<br>(70.5) | 2303<br>(58.1) | 203<br>(75.5)    | 1032<br>(62.1) | 671<br>(46.9) |
| Directed donation                                                  | 692<br>(14.7)    | 3027<br>(13.5)  | 2237<br>(13.4) | 112<br>(9.5)     | 643<br>(10.9)  | 439<br>(11.9)  | 99<br>(11.6)        | 634<br>(12.5)  | 548<br>(13.8)  | 35<br>(13.0)     | 239<br>(14.4)  | 224<br>(15.7) |
| Non-directed donation or kidney paired donation or domino donation | 580<br>(12.3)    | 6817<br>(30.3)  | 7011<br>(42.0) | 102<br>(8.6)     | 1220<br>(20.7) | 1347<br>(36.4) | 69<br>(8.0)         | 860<br>(17.0)  | 1111<br>(28.1) | 31<br>(11.5)     | 390<br>(23.5)  | 535<br>(37.4) |

LDKT = live donor kidney transplantation; DDKT = deceased donor kidney transplantation.

\*Results were calculated using data from LDKT recipients in 1995-1999, 2000-2009, and 2010-2014. There were statistically significant differences ( $p < 0.05$ ) in recipient and donor characteristics for all comparisons by time cohort in each racial/ethnic group.

Definitions: Directed donation occurs when a request is made by a donor or donor family to transplant a specific recipient. Non-directed donation occurs when there is no request for a specific transplant recipient made by a donor or donor family. Kidney paired donation occurs when a donor is incompatible with the recipient, and exchanges kidneys with another donor/recipient pair, resulting in two transplants. Domino donation occurs when a non-directed donor starts a chain of transplants, resulting in several transplants.
